# Supplementary material for: Magnetic couplings and applied electric field regulation in diradical SiC defect diamond-like nanoclusters
Source: Royal Society of Chemistry journal article supplement (doi:10.1039/d2nj01909d), 2022-01-01
Supplement: d2nj01909d1.pdf [file d2nj01909d1.pdf]

**Magnetic Couplings and Applied Electric Field Regulation in Diradical SiC Defect  
Diamond-like Nanoclusters**

Xuexing Lin, Yuxiang Bu\*

*School of Chemistry and Chemical Engineering, Shandong University, Jinan, 250100, P. R.  
China*

**Electronic Supplementary Information**

**Table S1.** The total energies of BS, T and CS states with their corresponding  $\langle S^2 \rangle$ ,  $J$  and  $d$  values of the SiC clusters with different defect centers, calculated at the B3LYP/6-311++G(d, p) level.

| Cluster    | $E_{BS}(\langle S^2 \rangle)$ (a.u.) | $E_T(\langle S^2 \rangle)$ (a.u.) | $E_{CS}$ (a.u.) | $J$ (cm <sup>-1</sup> ) | $d$ (Å) |
|------------|--------------------------------------|-----------------------------------|-----------------|-------------------------|---------|
| SiC-NVe    | -5860.31875(1.009)                   | -5860.32308(2.021)                | -5860.29042     | 938.5                   | 3.793   |
| SiC-NVeF   | -9435.42725(1.014)                   | -9435.43347(2.023)                | -9435.39923     | 1352.3                  | 3.639   |
| SiC-NVe-1  | -10264.89955(1.009)                  | -10264.90562(2.018)               | -10264.87231    | 1321.9                  | 3.325   |
| SiC-NVeF-1 | -16220.91324(1.010)                  | -16220.91956(2.019)               | -16220.88794    | 1376.1                  | 3.405   |
| SiC-NNV    | -5876.97514(0.984)                   | -5876.97416(2.008)                | -5876.96787     | -211.4                  | 3.908   |
| SiC-NBV    | -5846.94247(0.966)                   | -5846.94083(2.008)                | -5846.93969     | -344.7                  | 3.827   |
| SiC-BBV    | -5816.90965(0.913)                   | -5816.90617(2.008)                | -5816.91072     | -                       | 1.738   |
| SiC-NNVF   | -9451.96003(0.970)                   | -9451.95848(2.006)                | -9451.94116     | -329.3                  | 3.754   |
| SiC-NBVF   | -9421.90454(0.940)                   | -9421.90197(2.007)                | -9421.89826     | -528.9                  | 3.672   |
| SiC-BBVF   | -9391.84866(0.866)                   | -9391.84361(2.007)                | -9391.84516     | -972.1                  | 3.559   |
| SiC-NNV-1  | -10281.57722(0.941)                  | -10281.57465(2.008)               | -10281.55728    | -528.7                  | 3.401   |
| SiC-NBV-1  | -10251.54123(0.898)                  | -10251.53724(2.009)               | -10251.52613    | -787.5                  | 3.418   |
| SiC-BBV-1  | -10221.50666(0.798)                  | -10221.49948(2.009)               | -10221.49793    | -1300.6                 | 3.428   |

**Table S2** The spacing  $d$  (Å) of any two atoms and corresponding total spin population (a.u.) in the defect center of the clusters with different defect centers, calculated at the B3LYP/6-311++G(d,p) level.

| <b>Cluster</b> | <b>N...C<sub>1</sub></b>             | <b>N...C<sub>2</sub></b>             | <b>N...C<sub>3</sub></b>             | <b>C<sub>1</sub>...C<sub>2</sub></b> | <b>C<sub>1</sub>...C<sub>3</sub></b> | <b>C<sub>2</sub>...C<sub>3</sub></b> | <b>N</b>             | <b>C<sub>1</sub></b> | <b>C<sub>2</sub></b> | <b>C<sub>3</sub></b> |
|----------------|--------------------------------------|--------------------------------------|--------------------------------------|--------------------------------------|--------------------------------------|--------------------------------------|----------------------|----------------------|----------------------|----------------------|
| SiC-NVe        | 3.844                                | 3.841                                | 3.841                                | 3.796                                | 3.796                                | 3.793                                | 0.024                | 0.740                | 0.738                | 0.738                |
| SiC-NVeF       | 3.759                                | 3.758                                | 3.758                                | 3.641                                | 3.641                                | 3.639                                | 0.043                | 0.570                | 0.568                | 0.568                |
| SiC-NVe-1      | 3.485                                | 3.486                                | 3.486                                | 3.326                                | 3.326                                | 3.325                                | -0.043               | 0.616                | 0.616                | 0.616                |
| SiC-NVeF-1     | 3.558                                | 3.558                                | 3.558                                | 3.406                                | 3.406                                | 3.405                                | -0.038               | 0.595                | 0.595                | 0.595                |
| <b>Cluster</b> | <b>N<sub>1</sub>...N<sub>2</sub></b> | <b>N<sub>1</sub>...C<sub>2</sub></b> | <b>N<sub>1</sub>...C<sub>3</sub></b> | <b>N<sub>2</sub>...C<sub>2</sub></b> | <b>N<sub>2</sub>...C<sub>3</sub></b> | <b>C<sub>2</sub>...C<sub>3</sub></b> | <b>N<sub>1</sub></b> | <b>N<sub>2</sub></b> | <b>C<sub>2</sub></b> | <b>C<sub>3</sub></b> |
| SiC-NNV        | 3.716                                | 3.815                                | 3.815                                | 3.814                                | 3.814                                | 3.908                                | 0.000                | 0.000                | 1.335                | -1.335               |
| SiC-NNVF       | 3.709                                | 3.738                                | 3.738                                | 3.739                                | 3.739                                | 3.754                                | 0.000                | 0.000                | 0.804                | -0.804               |
| SiC-NNV-1      | 3.507                                | 3.471                                | 3.471                                | 3.472                                | 3.472                                | 3.401                                | 0.000                | 0.000                | 0.582                | -0.582               |
| <b>Cluster</b> | <b>N...B</b>                         | <b>N...C<sub>2</sub></b>             | <b>N...C<sub>3</sub></b>             | <b>B...C<sub>2</sub></b>             | <b>B...C<sub>3</sub></b>             | <b>C<sub>2</sub>...C<sub>3</sub></b> | <b>N</b>             | <b>B</b>             | <b>C<sub>2</sub></b> | <b>C<sub>3</sub></b> |
| SiC-NBV        | 3.905                                | 4.006                                | 4.006                                | 3.748                                | 3.748                                | 3.827                                | 0.000                | 0.000                | 1.085                | -1.085               |
| SiC-NBVF       | 3.796                                | 3.692                                | 3.692                                | 3.823                                | 3.823                                | 3.672                                | 0.000                | 0.000                | 0.786                | -0.786               |
| SiC-NBV-1      | 3.440                                | 3.496                                | 3.496                                | 3.389                                | 3.389                                | 3.418                                | 0.000                | 0.000                | -0.765               | 0.765                |
| <b>Cluster</b> | <b>B<sub>1</sub>...B<sub>2</sub></b> | <b>B<sub>1</sub>...C<sub>2</sub></b> | <b>B<sub>1</sub>...C<sub>3</sub></b> | <b>B<sub>2</sub>...C<sub>2</sub></b> | <b>B<sub>2</sub>...C<sub>3</sub></b> | <b>C<sub>2</sub>...C<sub>3</sub></b> | <b>B<sub>1</sub></b> | <b>B<sub>2</sub></b> | <b>C<sub>2</sub></b> | <b>C<sub>3</sub></b> |
| SiC-BBV        | 4.444                                | 3.623                                | 3.623                                | 3.623                                | 3.623                                | 1.738                                | 0.000                | 0.000                | 0.000                | 0.000                |
| SiC-BBVF       | 3.943                                | 3.750                                | 3.750                                | 3.751                                | 3.751                                | 3.559                                | 0.000                | 0.000                | 0.804                | -0.804               |
| SiC-BBV-1      | 3.402                                | 3.415                                | 3.415                                | 3.415                                | 3.415                                | 3.428                                | 0.000                | 0.000                | -0.796               | 0.796                |

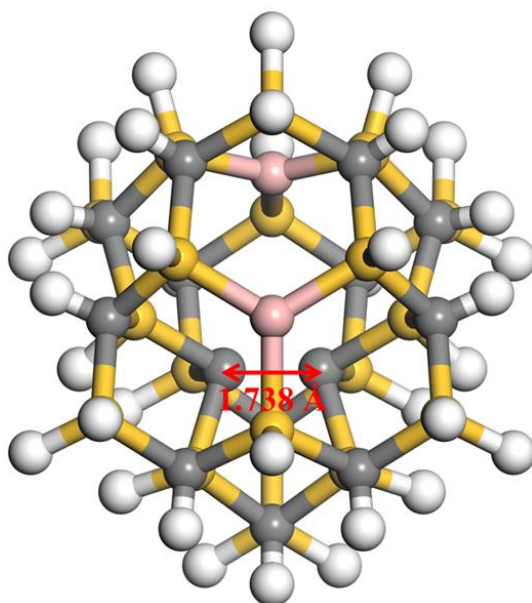

**Figure S1.** The SiC-BBV cluster featuring a long C-C single bond

**Table S3.** The orbital levels and their gaps between HOMO and LUMO (eV) of the clusters with different defect centers, calculated at the B3LYP/6-311++G(d, p) level.

| Cluster    | HOMO   | LUMO   | Gap   |
|------------|--------|--------|-------|
| SiC-NVe    | -2.204 | -0.659 | 1.545 |
| SiC-NVeF   | -6.045 | -4.159 | 1.886 |
| SiC-NVe-1  | -2.019 | 0.042  | 2.061 |
| SiC-NVeF-1 | -6.147 | -4.293 | 1.854 |
| SiC-NNV    | -6.526 | -3.450 | 3.077 |
| SiC-NBV    | -6.559 | -3.614 | 2.946 |
| SiC-BBV    | -6.912 | -3.311 | 3.601 |
| SiC-NNVF   | -9.792 | -7.041 | 2.751 |
| SiC-NBVF   | -9.771 | -7.289 | 2.482 |
| SiC-BBVF   | -9.655 | -7.631 | 2.024 |
| SiC-NNV-1  | -5.668 | -2.569 | 3.099 |
| SiC-NBV-1  | -5.761 | -2.929 | 2.832 |
| SiC-BBV-1  | -6.020 | -3.363 | 2.657 |

**Table S4.** The electronic configuration of doping N and B atoms and C-radicals in the defect center of the clusters with different defect centers through the NBO analysis, calculate at the B3LYP/6-311++G(d, p) level.

| Cluster    | N or B              | C <sub>1</sub> , N or B           | C <sub>2</sub>              | C <sub>3</sub>              |
|------------|---------------------|-----------------------------------|-----------------------------|-----------------------------|
| SiC-NVe    | N, 2s(0.76)2p(2.60) | C <sub>1</sub> , 2s(0.65)2p(1.81) | $\alpha$ , 2s(0.65)2p(1.81) | $\alpha$ , 2s(0.65)2p(1.81) |
| SiC-NVeF   | N, 2s(0.78)2p(2.61) | C <sub>1</sub> , 2s(0.68)2p(1.80) | $\alpha$ , 2s(0.68)2p(1.80) | $\alpha$ , 2s(0.68)2p(1.80) |
| SiC-NVe-1  | N, 2s(0.78)2p(2.69) | C <sub>1</sub> , 2s(0.65)2p(1.83) | $\alpha$ , 2s(0.65)2p(1.83) | $\alpha$ , 2s(0.65)2p(1.83) |
| SiC-NVeF-1 | N, 2s(0.78)2p(2.67) | C <sub>1</sub> , 2s(0.65)2p(1.85) | $\alpha$ , 2s(0.65)2p(1.85) | $\alpha$ , 2s(0.65)2p(1.85) |
| SiC-NNV    | N, 2s(0.76)2p(2.60) | N, 2s(0.76)2p(2.60)               | $\alpha$ , 2s(0.66)2p(1.55) | $\beta$ , 2s(0.69)2p(2.38)  |
| SiC-NBV    | N, 2s(0.77)2p(2.59) | B, 2s(0.56)2p(1.01)               | $\beta$ , 2s(0.69)2p(2.36)  | $\alpha$ , 2s(0.66)2p(1.55) |
| SiC-BBV    | B, 2s(0.56)2p(0.98) | B, 2s(0.56)2p(0.98)               | $\beta$ , 2s(0.61)2p(2.09)  | $\beta$ , 2s(0.61)2p(2.09)  |
| SiC-NNVF   | N, 2s(0.78)2p(2.61) | N, 2s(0.78)2p(2.61)               | $\beta$ , 2s(0.72)2p(2.40)  | $\alpha$ , 2s(0.69)2p(1.55) |
| SiC-NBVF   | N, 2s(0.78)2p(2.60) | B, 2s(0.60)2p(1.14)               | $\beta$ , 2s(0.72)2p(2.39)  | $\alpha$ , 2s(0.69)2p(1.56) |
| SiC-BBVF   | B, 2s(0.60)2p(1.13) | B, 2s(0.60)2p(1.14)               | $\beta$ , 2s(0.73)2p(2.35)  | $\alpha$ , 2s(0.70)2p(1.57) |
| SiC-NNV-1  | N, 2s(0.78)2p(2.67) | N, 2s(0.78)2p(2.67)               | $\alpha$ , 2s(0.66)2p(1.47) | $\beta$ , 2s(0.70)2p(2.20)  |
| SiC-NBV-1  | N, 2s(0.78)2p(2.67) | B, 2s(0.53)2p(0.65)               | $\beta$ , 2s(0.69)2p(2.17)  | $\alpha$ , 2s(0.66)2p(1.46) |
| SiC-BBV-1  | B, 2s(0.51)2p(0.81) | B, 2s(0.51)2p(0.81)               | $\beta$ , 2s(0.67)2p(1.88)  | $\alpha$ , 2s(0.67)2p(1.88) |

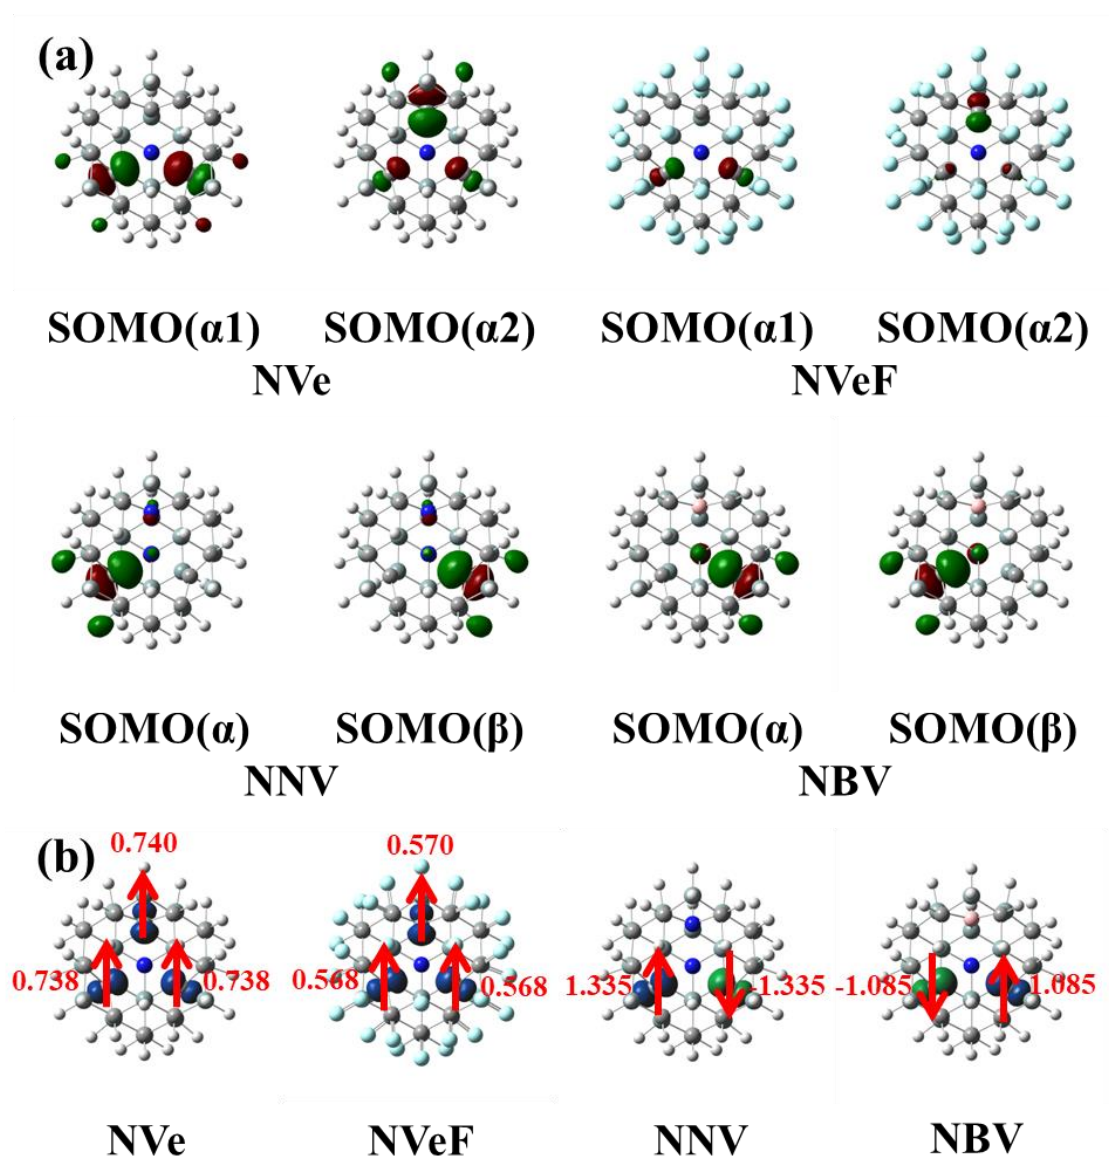

**Figure S2.** The (a) singly occupied molecular orbital (isovalue = 0.05) and (b) spin density distribution (isovalue = 0.01) of the clusters with different defect centers, calculated at the B3LYP/6-311++G(d, p) level.

**Table S5.** The total energy,  $J$  and  $d$  of the SiC-NVe cluster under an applied electric field (Intensity,  $I$ ) (a.u.), calculated at the B3LYP/6-311++G(d, p) level.

| Cluster  | $I$    | $E_{BS}(\langle S^2 \rangle)$ (a.u.) | $E_T(\langle S^2 \rangle)$ (a.u.) | $E_{CS}$ (a.u.) | $J$ (cm <sup>-1</sup> ) | $d$ (Å) |
|----------|--------|--------------------------------------|-----------------------------------|-----------------|-------------------------|---------|
| SiC-NVe  | -0.012 | -5860.38674(0.991)                   | -5860.38627(2.009)                | -5860.38246     | -102.0                  | 3.880   |
| (y-axis) | -0.010 | -5860.36801(0.993)                   | -5860.36776(2.009)                | -5860.36283     | -54.8                   | 3.887   |
|          | -0.008 | -5860.35230(0.997)                   | -5860.35233(2.010)                | -5860.34616     | 8.1                     | 3.909   |
|          | -0.006 | -5860.33957(1.000)                   | -5860.33997(2.011)                | -5860.33235     | 87.3                    | 3.899   |
|          | -0.004 | -5860.32970(1.003)                   | -5860.33077(2.014)                | -5860.32136     | 231.4                   | 3.881   |
|          | -0.002 | -5860.32275(1.007)                   | -5860.32499(2.019)                | -5860.29290     | 485.5                   | 3.840   |
|          | 0.000  | -5860.31875(1.009)                   | -5860.32308(2.021)                | -5860.29042     | 938.5                   | 3.793   |
|          | 0.002  | -5860.31775(1.008)                   | -5860.32479(2.021)                | -5860.29157     | 1526.1                  | 3.778   |
|          | 0.004  | -5860.31983(1.002)                   | -5860.32967(2.020)                | -5860.29907     | 2121.4                  | 3.777   |
|          | 0.006  | -5860.32508(0.987)                   | -5860.33752(2.019)                | -5860.30799     | 2645.1                  | 3.782   |
|          | 0.008  | -5860.33360(0.959)                   | -5860.34828(2.019)                | -5860.32002     | 3038.3                  | 3.791   |
|          | 0.010  | -5860.34545(0.912)                   | -5860.36194(2.020)                | -5860.33522     | 3266.2                  | 3.802   |
|          | 0.012  | -                                    | -                                 | -               | -                       | -       |
| SiC-NVe  | -0.012 | -                                    | -                                 | -               | -                       | -       |
| (z-axis) | -0.010 | -                                    | -                                 | -               | -                       | -       |
|          | -0.008 | -5860.34562(1.009)                   | -5860.34978(2.024)                | -5860.31705     | 899.6                   | 3.820   |
|          | -0.006 | -5860.33479(1.009)                   | -5860.33900(2.023)                | -5860.30626     | 911.8                   | 3.812   |
|          | -0.004 | -5860.32671(1.009)                   | -5860.33097(2.022)                | -5860.29824     | 922.2                   | 3.806   |
|          | -0.002 | -5860.32137(1.009)                   | -5860.32566(2.022)                | -5860.29296     | 931.0                   | 3.799   |
|          | 0.000  | -5860.31875(1.009)                   | -5860.32308(2.021)                | -5860.29042     | 938.5                   | 3.793   |
|          | 0.002  | -5860.31886(1.009)                   | -5860.32321(2.021)                | -5860.29060     | 944.7                   | 3.788   |
|          | 0.004  | -5860.32169(1.009)                   | -5860.32607(2.021)                | -5860.29353     | 949.7                   | 3.782   |
|          | 0.006  | -5860.32727(1.009)                   | -5860.33167(2.021)                | -5860.29921     | 953.6                   | 3.777   |
|          | 0.008  | -5860.33562(1.009)                   | -5860.34003(2.022)                | -5860.30766     | 956.5                   | 3.772   |
|          | 0.010  | -5860.34677(1.009)                   | -5860.35119(2.022)                | -5860.31893     | 958.4                   | 3.768   |
|          | 0.012  | -5860.36078(1.009)                   | -5860.36521(2.022)                | -5860.33307     | 959.5                   | 3.763   |

**Table S6.** The spacing  $d$  (Å) of any two atoms and corresponding total spin population (a.u.) in the defect center of the SiC-NVe cluster under an applied electric field (a.u.), calculated at the B3LYP/6-311++G(d, p) level.

| Cluster  | $I$    | N...C <sub>1</sub> | N...C <sub>2</sub> | N...C <sub>3</sub> | C <sub>1</sub> ...C <sub>2</sub> | C <sub>1</sub> ...C <sub>3</sub> | C <sub>2</sub> ...C <sub>3</sub> | N     | C <sub>1</sub> | C <sub>2</sub> | C <sub>3</sub> |
|----------|--------|--------------------|--------------------|--------------------|----------------------------------|----------------------------------|----------------------------------|-------|----------------|----------------|----------------|
| SiC-NVe  | -0.012 | 3.906              | 3.832              | 3.832              | 3.972                            | 3.972                            | 3.880                            | 0.000 | 0.000          | -1.169         | 1.169          |
| (y-axis) | -0.010 | 3.888              | 3.837              | 3.837              | 3.948                            | 3.948                            | 3.887                            | 0.000 | 0.000          | -1.149         | 1.149          |
|          | -0.008 | 3.856              | 3.849              | 3.849              | 3.901                            | 3.901                            | 3.909                            | 0.012 | 0.034          | 1.199          | 1.199          |
|          | -0.006 | 3.839              | 3.852              | 3.852              | 3.865                            | 3.865                            | 3.899                            | 0.014 | 0.085          | 1.146          | 1.146          |
|          | -0.004 | 3.826              | 3.853              | 3.853              | 3.829                            | 3.829                            | 3.881                            | 0.018 | 0.189          | 1.063          | 1.063          |
|          | -0.002 | 3.826              | 3.850              | 3.850              | 3.796                            | 3.796                            | 3.840                            | 0.022 | 0.415          | 0.916          | 0.916          |
|          | 0.000  | 3.844              | 3.841              | 3.841              | 3.796                            | 3.796                            | 3.793                            | 0.024 | 0.740          | 0.738          | 0.738          |
|          | 0.002  | 3.854              | 3.837              | 3.837              | 3.813                            | 3.813                            | 3.778                            | 0.023 | 0.935          | 0.647          | 0.647          |
|          | 0.004  | 3.859              | 3.837              | 3.837              | 3.830                            | 3.830                            | 3.777                            | 0.022 | 1.049          | 0.598          | 0.598          |
|          | 0.006  | 3.860              | 3.839              | 3.839              | 3.845                            | 3.845                            | 3.782                            | 0.020 | 1.124          | 0.570          | 0.570          |
|          | 0.008  | 3.859              | 3.843              | 3.843              | 3.860                            | 3.860                            | 3.791                            | 0.018 | 1.181          | 0.552          | 0.552          |
|          | 0.010  | 3.857              | 3.847              | 3.847              | 3.874                            | 3.874                            | 3.802                            | 0.017 | 1.228          | 0.544          | 0.544          |
|          | 0.012  | -                  | -                  | -                  | -                                | -                                | -                                | -     | -              | -              | -              |
| SiC-NVe  | -0.012 | -                  | -                  | -                  | -                                | -                                | -                                | -     | -              | -              | -              |
| (z-axis) | -0.010 | -                  | -                  | -                  | -                                | -                                | -                                | -     | -              | -              | -              |
|          | -0.008 | 3.833              | 3.831              | 3.831              | 3.822                            | 3.822                            | 3.820                            | 0.021 | 0.721          | 0.719          | 0.719          |
|          | -0.006 | 3.835              | 3.832              | 3.832              | 3.815                            | 3.815                            | 3.812                            | 0.021 | 0.727          | 0.725          | 0.725          |
|          | -0.004 | 3.837              | 3.835              | 3.835              | 3.808                            | 3.808                            | 3.806                            | 0.022 | 0.732          | 0.730          | 0.730          |
|          | -0.002 | 3.840              | 3.838              | 3.838              | 3.802                            | 3.802                            | 3.799                            | 0.023 | 0.737          | 0.735          | 0.735          |
|          | 0.000  | 3.844              | 3.841              | 3.841              | 3.796                            | 3.796                            | 3.793                            | 0.024 | 0.740          | 0.738          | 0.738          |
|          | 0.002  | 3.848              | 3.845              | 3.845              | 3.790                            | 3.790                            | 3.788                            | 0.026 | 0.744          | 0.742          | 0.742          |
|          | 0.004  | 3.853              | 3.850              | 3.850              | 3.785                            | 3.785                            | 3.782                            | 0.027 | 0.747          | 0.745          | 0.745          |
|          | 0.006  | 3.858              | 3.855              | 3.855              | 3.780                            | 3.780                            | 3.777                            | 0.028 | 0.750          | 0.748          | 0.748          |
|          | 0.008  | 3.864              | 3.861              | 3.861              | 3.775                            | 3.775                            | 3.772                            | 0.028 | 0.753          | 0.751          | 0.751          |
|          | 0.010  | 3.870              | 3.867              | 3.867              | 3.770                            | 3.770                            | 3.768                            | 0.025 | 0.756          | 0.756          | 0.756          |
|          | 0.012  | 3.877              | 3.874              | 3.874              | 3.765                            | 3.765                            | 3.763                            | 0.014 | 0.766          | 0.764          | 0.764          |

**Table S7.** The orbital levels and their gaps between HOMO and LUMO (eV) of the SiC-NVe cluster under an applied electric field in y and z-axes (a.u.), calculated at the B3LYP/6-311++G(d, p) level.

| <i>I</i> | Cluster  | HOMO   | LUMO   | Gap   | Cluster  | HOMO   | LUMO   | Gap   |
|----------|----------|--------|--------|-------|----------|--------|--------|-------|
| -0.012   | SiC-NVe  | -2.750 | -1.005 | 1.746 | SiC-NVe  | -      | -      | -     |
| -0.010   | (y-axis) | -2.626 | -0.558 | 2.069 | (z-axis) | -      | -      | -     |
| -0.008   |          | -2.527 | -0.753 | 1.774 |          | -2.353 | -0.841 | 1.512 |
| -0.006   |          | -2.421 | -0.759 | 1.662 |          | -2.310 | -0.787 | 1.522 |
| -0.004   |          | -2.323 | -0.761 | 1.562 |          | -2.271 | -0.739 | 1.531 |
| -0.002   |          | -2.238 | -0.739 | 1.499 |          | -2.235 | -0.697 | 1.539 |
| 0.000    |          | -2.204 | -0.659 | 1.545 |          | -2.204 | -0.659 | 1.545 |
| 0.002    |          | -2.220 | -0.742 | 1.478 |          | -2.176 | -0.625 | 1.551 |
| 0.004    |          | -2.255 | -0.818 | 1.437 |          | -2.151 | -0.595 | 1.556 |
| 0.006    |          | -2.298 | -0.892 | 1.407 |          | -2.130 | -0.569 | 1.562 |
| 0.008    |          | -2.350 | -0.968 | 1.381 |          | -2.114 | -0.547 | 1.566 |
| 0.010    |          | -2.409 | -1.051 | 1.358 |          | -2.101 | -0.531 | 1.570 |
| 0.012    |          | -      | -      | -     |          | -2.094 | -0.827 | 1.267 |



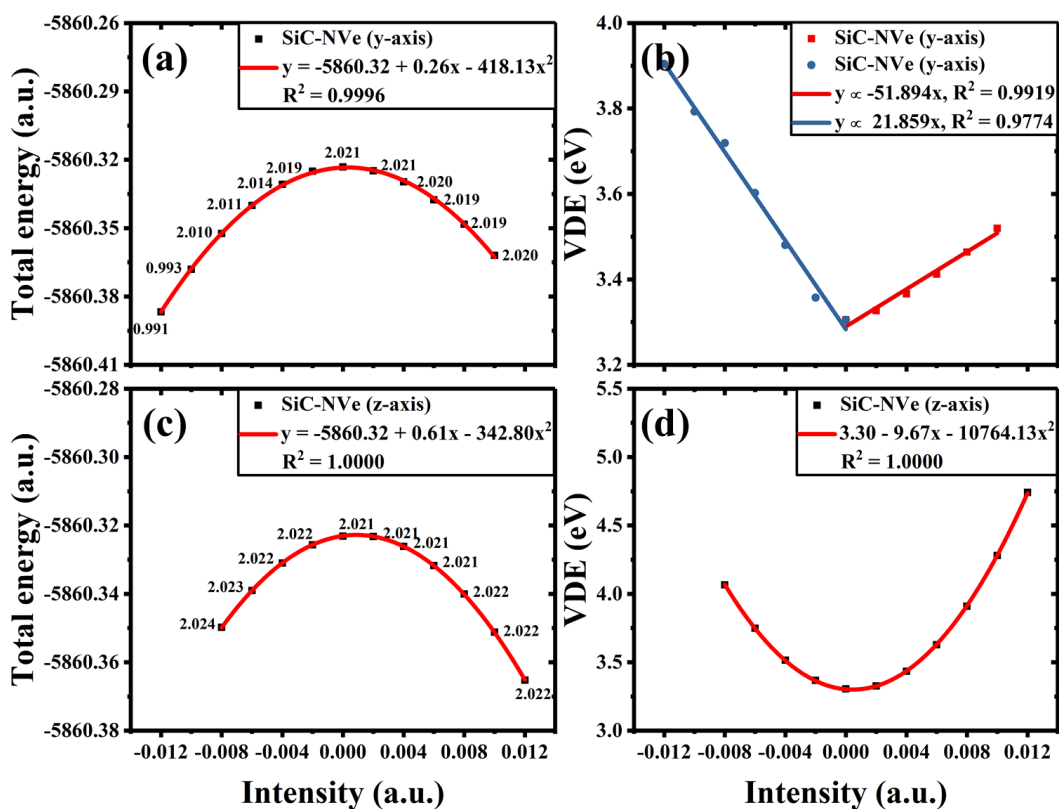

**Figure S3.** The total energy and the corresponding VDE of the SiC-NVe cluster under an applied electric field in (a) and (b) y-axis and (c) and (d) z-axis respectively, calculated at the B3LYP/6-311++G(d, p) level.

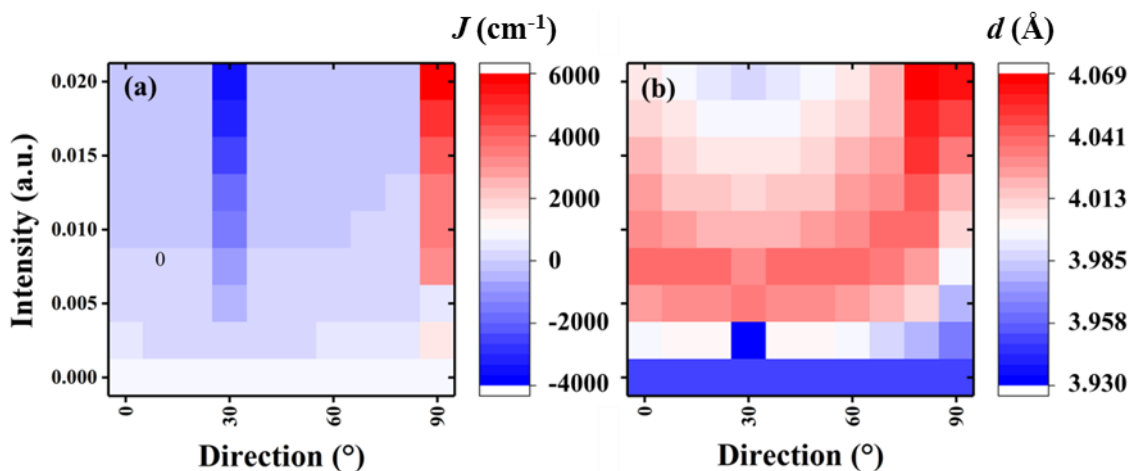

**Figure S4.** The (a)  $J$  and (b)  $d$  of SiC-NVe cluster under an applied electric field at each angular direction of the C-radical plane, calculated at the B3LYP/6-311G(d, p) level.

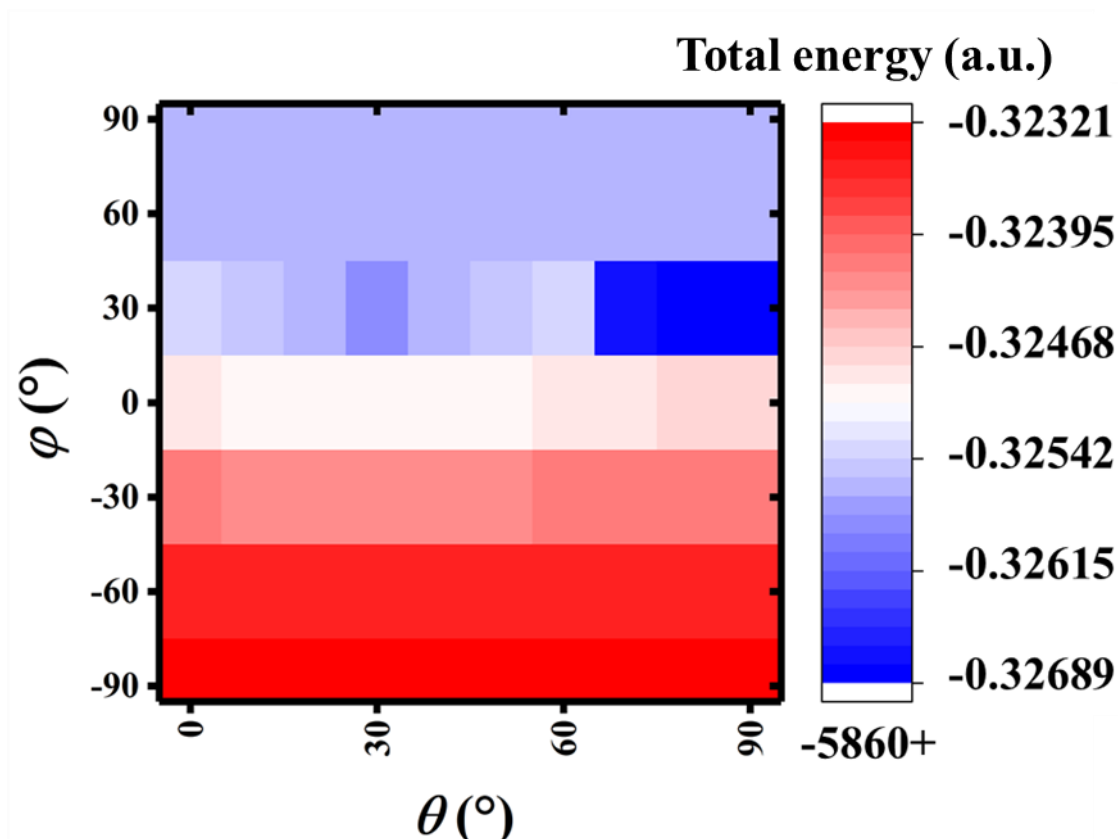

**Figure S5.** The total energy (a.u.) of the SiC-NVe cluster (taking  $|I| = 0.002$  a.u. as an example) under an applied electric field at each angle ( $\theta$ ,  $\phi$ ) in space, calculated at the B3LYP/6-311++G(d, p) level.

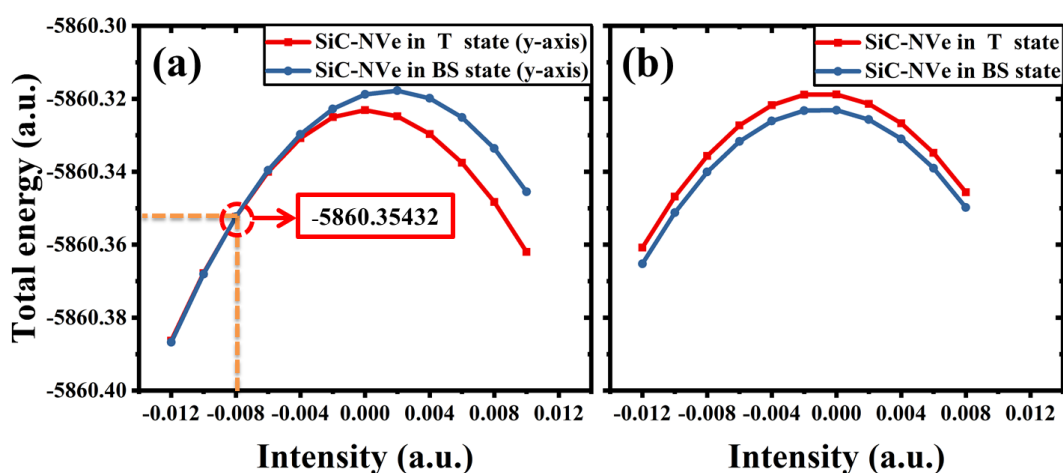

**Figure S6.** The total energy (a.u.) in (a) y-axis and (b) z-axis of the SiC-NVe cluster under an applied electric field respectively, calculated at the B3LYP/6-311++G(d, p) level.

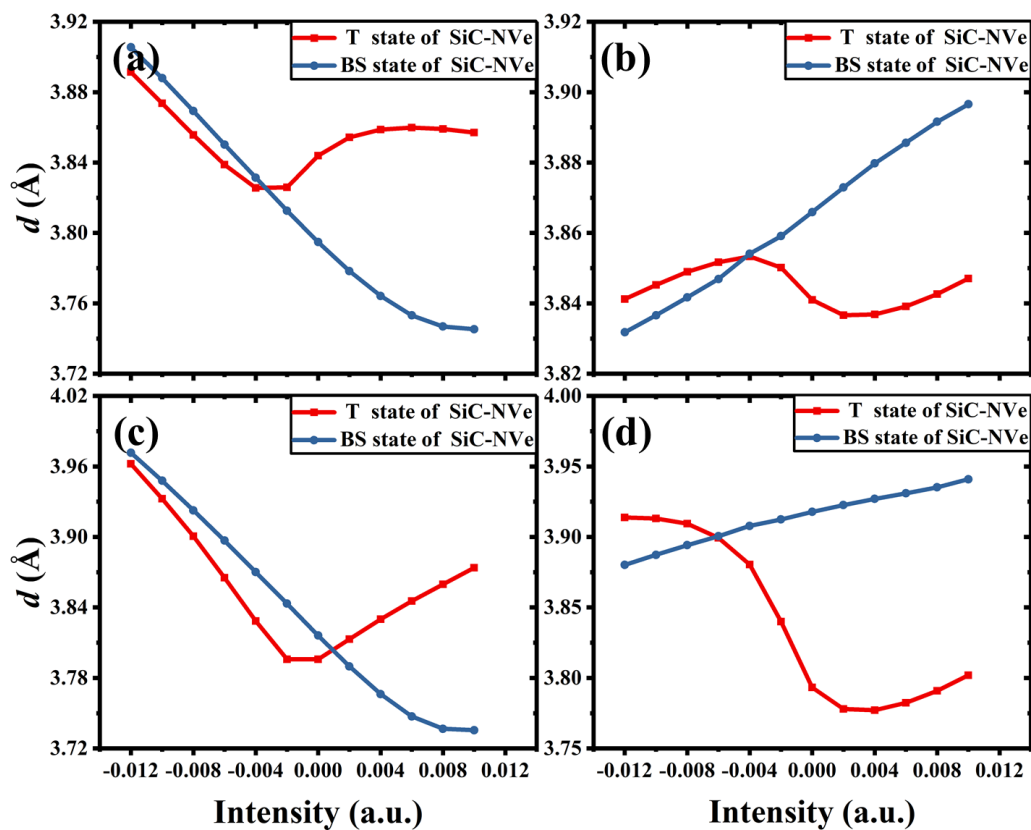

**Figure S7.** The relationships between the electric field intensity and the spacing  $d$  (a) N...C<sub>1</sub>, (b) N...C<sub>2</sub> (C<sub>3</sub>), (c) C<sub>1</sub>...C<sub>2</sub> (C<sub>3</sub>) and (d) C<sub>2</sub>...C<sub>3</sub> of any two atoms in the defect center of the SiC-NVe cluster in the T and BS states, respectively, under an applied electric field in y-axis, calculated at the B3LYP/6-311++G(d, p) level.

**Table S8.** The energy levels (a.u.) and the two average energy levels (eV) of SOMO( $\alpha$ 1), SOMO( $\alpha$ 2), SOMO( $\alpha$ 3) and SOMO( $\beta$ 1) (or HOMO) in the T state or SOMO( $\alpha$ ), SOMO( $\beta$ ), NSOMO( $\alpha$ ) and NSOMO( $\beta$ ) in the BS state of the SiC-NVe cluster under an applied electric field (Intensity,  $I$ ) (a.u.), calculated at the B3LYP/6-311++G(d, p) level.

| $I$    | SOMO( $\alpha$ 1) or<br>SOMO( $\alpha$ ) | SOMO( $\alpha$ 2) or<br>SOMO( $\beta$ ) | SOMO( $\alpha$ 3) or<br>NSOMO( $\alpha$ ) | SOMO( $\beta$ 1) or<br>NSOMO( $\beta$ ) | Average-1 | Average-2 |
|--------|------------------------------------------|-----------------------------------------|-------------------------------------------|-----------------------------------------|-----------|-----------|
| -0.012 | -0.10107                                 | -0.10107                                | -0.13547                                  | -0.13547                                | -2.750    | -3.218    |
| -0.010 | -0.09651                                 | -0.09651                                | -0.13570                                  | -0.13570                                | -2.626    | -3.159    |
| -0.008 | -0.09691                                 | -0.12736                                | -0.14036                                  | -0.09287                                | -3.051    | -3.112    |
| -0.006 | -0.09615                                 | -0.12679                                | -0.13995                                  | -0.08897                                | -3.033    | -3.074    |
| -0.004 | -0.09808                                 | -0.12501                                | -0.13887                                  | -0.08537                                | -3.035    | -3.043    |
| -0.002 | -0.10531                                 | -0.12028                                | -0.13636                                  | -0.08223                                | -3.069    | -3.022    |
| 0.000  | -0.11374                                 | -0.11383                                | -0.13456                                  | -0.08099                                | -3.096    | -3.014    |
| 0.002  | -0.11118                                 | -0.11606                                | -0.13498                                  | -0.08160                                | -3.092    | -3.019    |
| 0.004  | -0.11088                                 | -0.11670                                | -0.13515                                  | -0.08286                                | -3.096    | -3.031    |
| 0.006  | -0.11167                                 | -0.11696                                | -0.13507                                  | -0.08446                                | -3.111    | -3.049    |
| 0.008  | -0.11314                                 | -0.11697                                | -0.13510                                  | -0.08635                                | -3.131    | -3.072    |
| 0.010  | -0.11516                                 | -0.11672                                | -0.13556                                  | -0.08853                                | -3.155    | -3.102    |
| 0.012  | -                                        | -                                       | -                                         | -                                       | -         | -         |

Note: Average-1 is the average of first two SOMOs in the Table, while Average-2 is all.

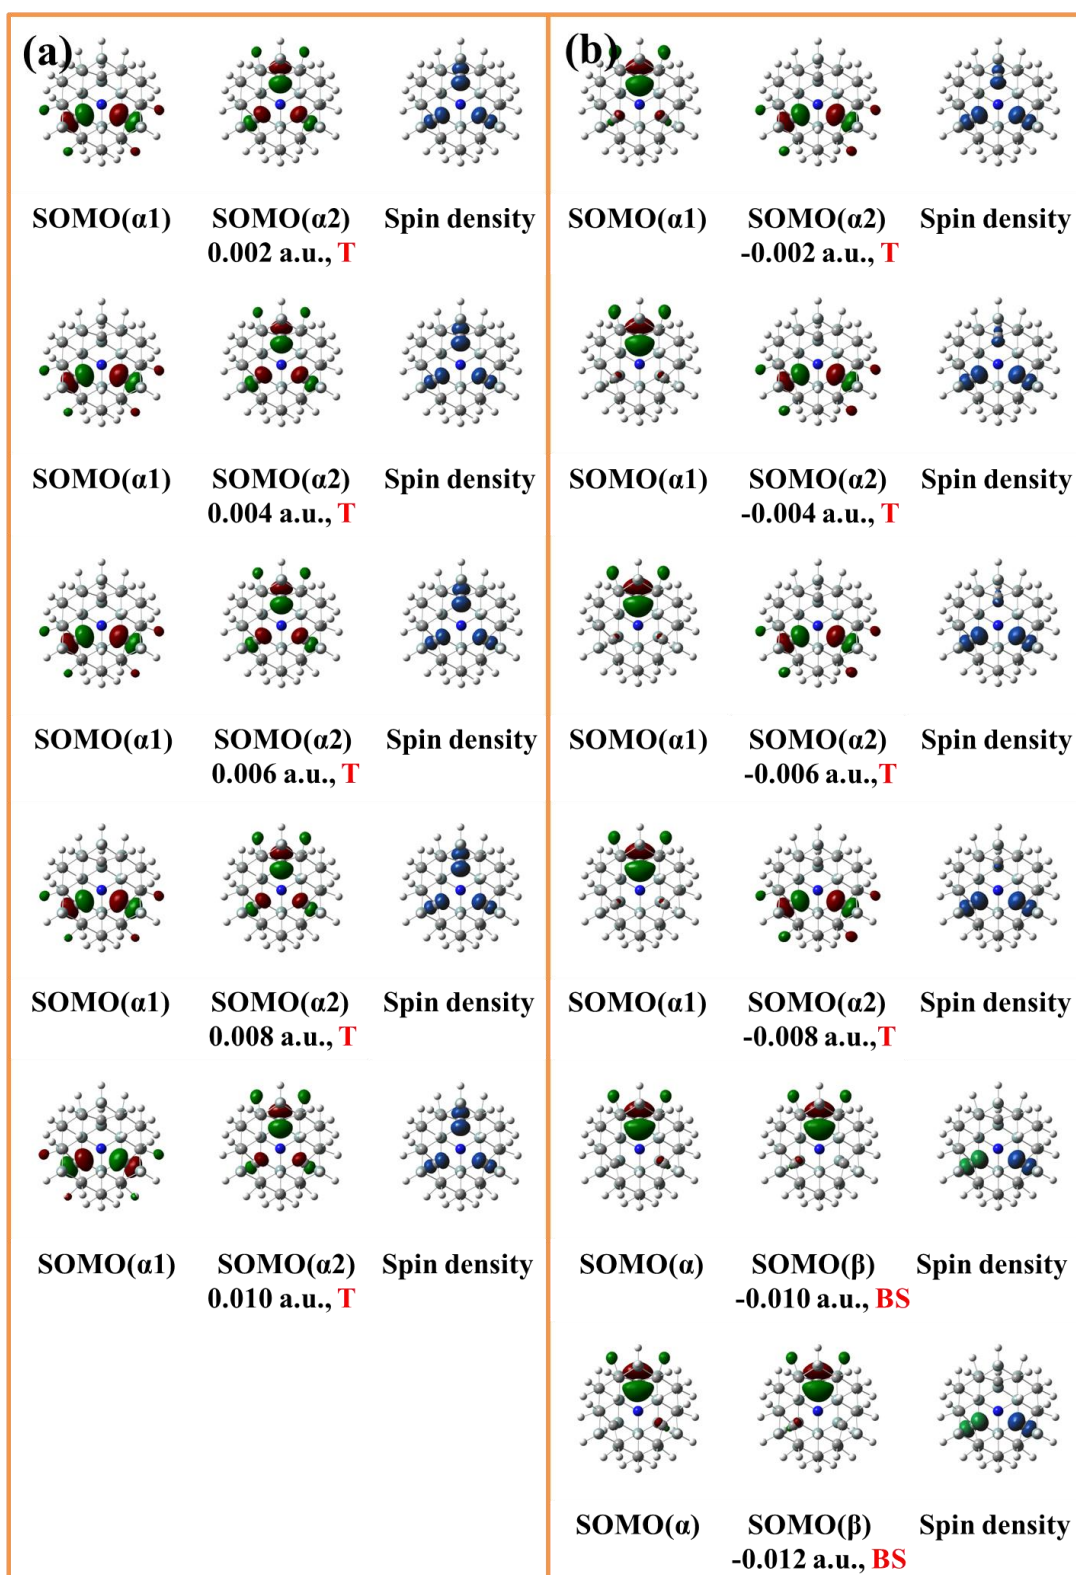

**Figure S8.** The singly occupied molecular orbital (isovalue = 0.05) and the spin density distribution (isovalue = 0.01) of the SiC-NVe cluster under **(a)** an applied positive and **(b)** an applied negative electric field in y-axis, calculated at the B3LYP/6-311++G(d, p) level.
